# Supplementary material for: Destruction of Toluene by the Combination of High Frequency Discharge Electrodeless Lamp and Manganese Oxide-Impregnated Granular Activated Carbon Catalyst
Source: Hindawi journal article supplement (doi:10.1155/2014/365862), 2014-01-01
Supplement: f1 [file 365862.f1.docx]

**Supplementary Materials**

**Destruction of Toluene by the Combination of High Frequency Discharge Electrodeless Lamp and Manganese Oxide-Impregnated Granular Activated Carbon Catalyst**

*Jianhui Xu1, Chaolin Li1*, Qian Zhang1, Di He2, Peng Liu1, Yong Ren1*

1Environmental Science & Engineering Research Center, Harbin Institute of Technology

Shenzhen Graduate School, Shenzhen, P. R. China

2School of Civil and Environmental Engineering, University of New South Wales, Sydney, NSW, Australia 2052

Email addresses: [273857069@qq.com](mailto:273857069@qq.com) (Jianhui Xu); lichaolinhit@gmail.com (Chaolin Li); [173403631@qq.com (Qian](mailto:173403631@qq.com%20(Qian) Zhang); [di.he@unsw.edu.au](mailto:di.he@unsw.edu.au) (Di He); 345222664@qq.com (Peng Liu); 229057115@qq.com (Yong Ren)

**International Journal of Photoenergy**

**Re-submitted August, 2014**

*__________________________________*

*Corresponding author: Professor Chaolin Li ([lichaolinhit@gmail.com](mailto:lichaolinhit@gmail.com))

**Section 1. Emission Spectrum of HFDEL**

**Fig. SM-1.** The emission spectrum of HFDEL

HFDEL was operated by coupling HF power to an arc discharge as electrodeless light sources. The filling gas in the lamp was excited by HF-mediated electromagnetic field. After excitation the atoms return to ground state by emitting UV light. The emission spectrum of UV radiation emitted by HFDELs is shown in Fig. SM-1 under 80 W of HF output power. The HFDELs containing a mixture of mercury and argon showed mainly atomic Hg emission lines at 185 nm (6s6p(1P1)—6s6p(1S0)) and 253.7 nm (62P1—62S0).

**Section 2. Stability and Distribution of Light Intensity of HFEDL**

**Fig. SM-2.** Light intensity at 254 nm of the outflow of HFDEL as a function of time.

The stability and distribution of light intensity at 253.7 nm in HFDEL were investigated. It was observed from Fig. SM-2 in Supplementary Material (SM) that the light intensity at the outflow of the photolysis reactor reached the peak at 132 µW cm-2 following 100 s illumination. With futher illumination (120 s), the light intensity became constant at 127 µW cm-2, which accounted for the 96% of peak value. In terms of the distribution of light intensity, the light intensity at 253.7 nm starts a dramatic decrease from the position of the center of HFDEL bottom to that of 10 cm to the center followed by a smooth decay of light intensity from the distance of 10 to 35 cm, as shown in Fig. SM-3. The dramatic decrease of light intensity near the center could be attributed to the scavenging effects of high concentration of ozone generated by VUV light near the lamp center on the light intensity at 253.7 nm.

**Fig. SM-3.** Light intensity at 254 nm of HFDEL as a function of the distance to bottom center of HFDEL.

**Section 3. Breakthrough Curve for the Adsorption of Toluene by MnO2-Impregnated GAC**

**Fig. SM-4.** The ratio of outlet to inlet toluene concentration (φ) as a function of saturation time during adsorption by MnO2-impregnated GAC.

**Section 4. Identification of Oxidation Intermediates**

**Fig. SM-5.** (a) GC spectrum and (b, c) MS spectra of intermediates formed during the photolysis of toluene.
